# Supplementary material for: Distinctive Kaposi Sarcoma-Associated Herpesvirus Serological Profile during Acute Plasmodium falciparum Malaria Episodes
Source: MDPI journal article supplement (doi:10.3390/ijms24076711), 2023-04-04
Supplement: s1 [file s1]

## Supplementary Figure

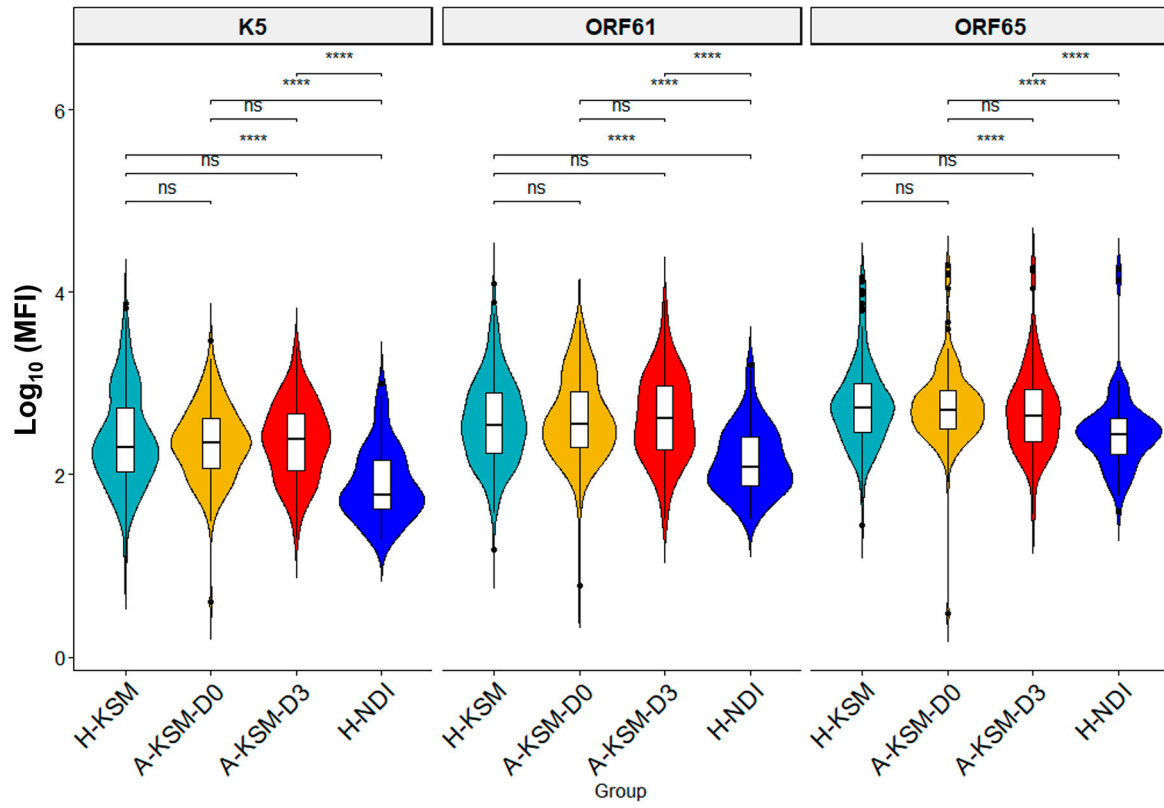

**Figure S1.** Additional comparison of IgG antibodies against K5, ORF61 and ORF65 antigens in A-KSM, H-KSM and H-NDI children. ) (\*\*\*\*  $p < 0.0001$ , ns:  $p > 0.05$ ).

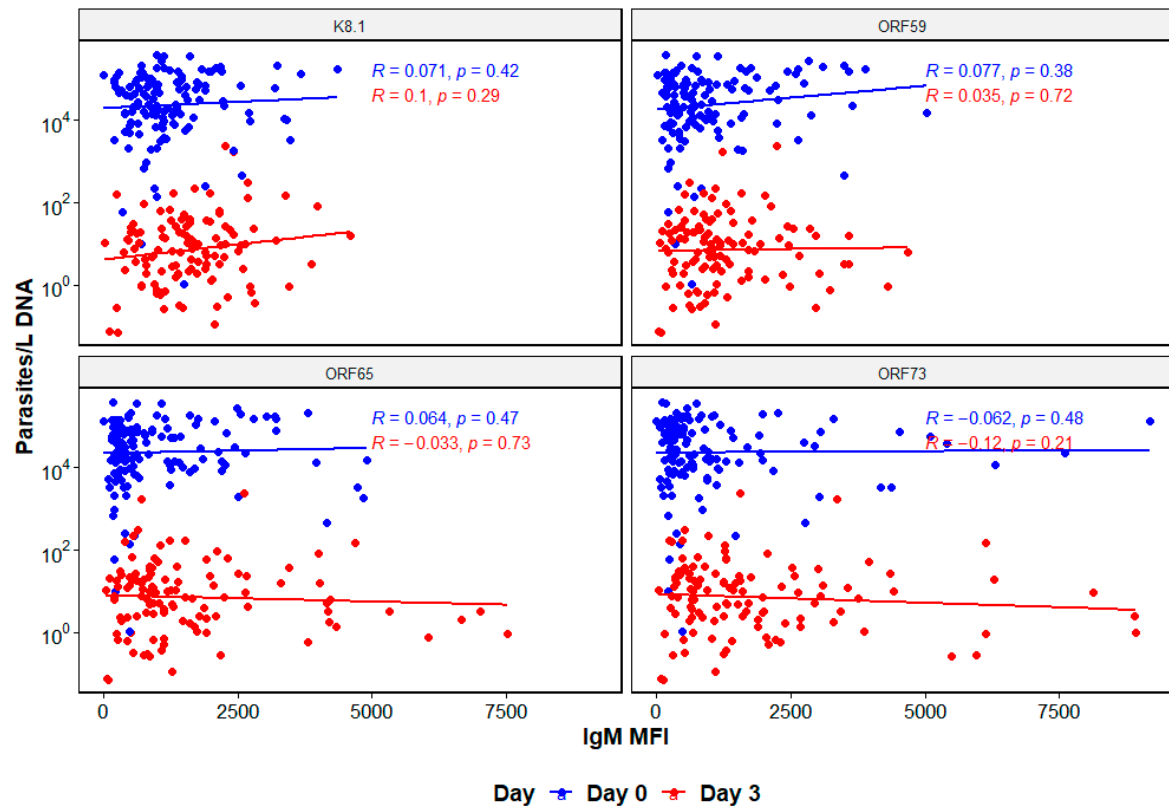

**Figure S2.** Correlation between anti-KSHV IgM antibodies (K8.1 ORF59, ORF65 and ORF73) with *P. falciparum* malaria parasite density in A-KSM-D0 and A-KSM-D3.

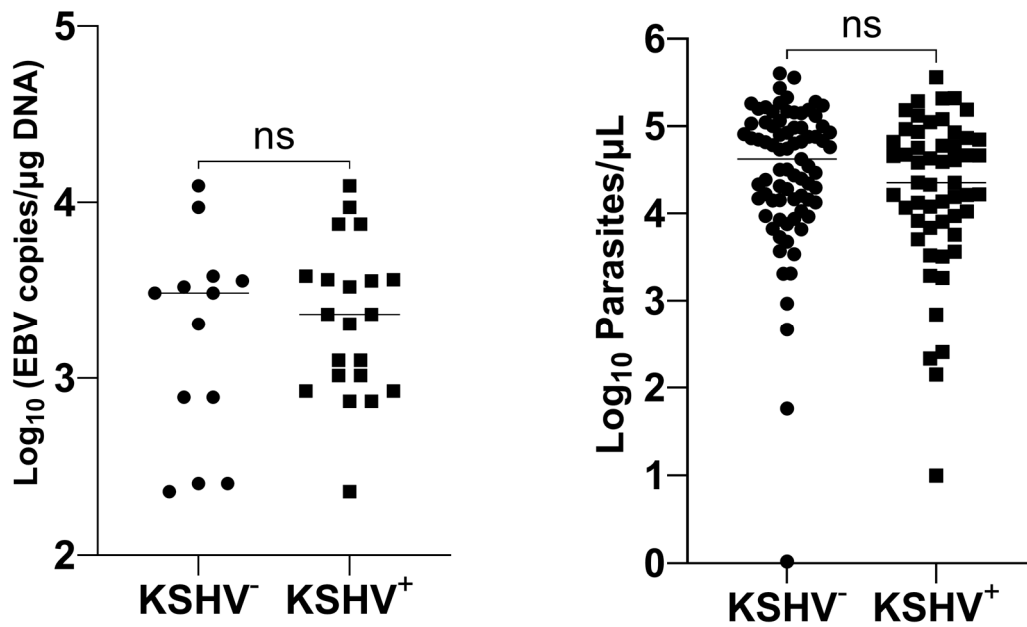

**Figure S3.** EBV and malaria parasite density in KSHV seropositive and seronegative A-KSM children.
