# Supplementary material for: Distinctive Kaposi Sarcoma-Associated Herpesvirus Serological Profile during Acute Plasmodium falciparum Malaria Episodes
Source: Int J Mol Sci. 2023 Apr 4;24(7):6711. doi: 10.3390/ijms24076711 (PMC10095526; doi:10.3390/ijms24076711)
Supplement: Supplementary file 1 [file ijms-24-06711-s001.zip › ijms-2230315-supplementary table.xlsx]

## Sheet: Table S1 KSHV ddPCR
Well	ExptType	Sample_ID	Target	KSHV Conc. (copies/ul)	Human- B-actin Conc. (copies/ul)	KSHV copies/cell	KSHV copies/ng DNA	KSHV copies/ug DNA	log KSHV copies
F07	Absolute Quantification	AH1001-Day0	KSHV-ORF26	0	1325	0	0	0	0
G07	Absolute Quantification	AH1001-Day3	KSHV-ORF26	0	1018	0	0	0	0
H07	Absolute Quantification	AH1002-Day0	KSHV-ORF26	0	772	0	0	0	0
A08	Absolute Quantification	AH1002-Day3	KSHV-ORF26	0	512	0	0	0	0
B08	Absolute Quantification	AH1003-Day0	KSHV-ORF26	0	0	0	0	0	0
C08	Absolute Quantification	AH1003-Day3	KSHV-ORF26	0	889	0	0	0	0
D08	Absolute Quantification	AH1004-Day0	KSHV-ORF26	0	147	0	0	0	0
E08	Absolute Quantification	AH1004-Day3	KSHV-ORF26	0	774	0	0	0	0
F08	Absolute Quantification	AH1005-Day0	KSHV-ORF26	0	966	0	0	0	0
G08	Absolute Quantification	AH1005-Day3	KSHV-ORF26	0	431	0	0	0	0
H08	Absolute Quantification	AH1006-Day0	KSHV-ORF26	0	469	0	0	0	0
A09	Absolute Quantification	AH1006-Day3	KSHV-ORF26	0	818	0	0	0	0
B09	Absolute Quantification	AH1007-Day0	KSHV-ORF26	0	392	0	0	0	0
C09	Absolute Quantification	AH1007-Day3	KSHV-ORF26	0	757	0	0	0	0
D09	Absolute Quantification	AH1008-Day0	KSHV-ORF26	0	422	0	0	0	0
E09	Absolute Quantification	AH1008-Day3	KSHV-ORF26	0	1212	0	0	0	0
F09	Absolute Quantification	AH1009-Day0	KSHV-ORF26	0	612	0	0	0	0
G09	Absolute Quantification	AH1009-Day3	KSHV-ORF26	0	1170	0	0	0	0
H09	Absolute Quantification	AH1010-Day0	KSHV-ORF26	0	0	0	0	0	0
A10	Absolute Quantification	AH1010-Day3	KSHV-ORF26	0	604	0	0	0	0
B10	Absolute Quantification	AH1011-Day0	KSHV-ORF26	0	919	0	0	0	0
C10	Absolute Quantification	AH1011-Day3	KSHV-ORF26	0	186	0	0	0	0
D10	Absolute Quantification	AH1012-Day0	KSHV-ORF26	0	448	0	0	0	0
E10	Absolute Quantification	AH1012-Day3	KSHV-ORF26	0	89.3	0	0	0	0
F10	Absolute Quantification	AH1013-Day0	KSHV-ORF26	0	344	0	0	0	0
G10	Absolute Quantification	AH1013-Day3	KSHV-ORF26	0	443	0	0	0	0
H10	Absolute Quantification	AH1014-Day0	KSHV-ORF26	0	367	0	0	0	0
A11	Absolute Quantification	AH1014-Day3	KSHV-ORF26	0	231	0	0	0	0
B11	Absolute Quantification	AH1015-Day0	KSHV-ORF26	0	956	0	0	0	0
C11	Absolute Quantification	AH1015-Day3	KSHV-ORF26	0	476	0	0	0	0
D11	Absolute Quantification	AH1016-Day0	KSHV-ORF26	0	1034	0	0	0	0
E11	Absolute Quantification	AH1016-Day3	KSHV-ORF26	0	365	0	0	0	0
F11	Absolute Quantification	AH1017-Day0	KSHV-ORF26	0	1053	0	0	0	0
G11	Absolute Quantification	AH1017-Day3	KSHV-ORF26	0	1542	0	0	0	0
H11	Absolute Quantification	AH1018-Day0	KSHV-ORF26	0	53.5	0	0	0	0
A12	Absolute Quantification	AH1018-Day3	KSHV-ORF26	0	1095	0	0	0	0
B12	Absolute Quantification	AH1019-Day0	KSHV-ORF26	0	869	0	0	0	0
C12	Absolute Quantification	AH1019-Day3	KSHV-ORF26	0	1534	0	0	0	0
D12	Absolute Quantification	AH1020-Day0	KSHV-ORF26	0	0	0	0	0	0
E12	Absolute Quantification	AH1020-Day3	KSHV-ORF26	0	469	0	0	0	0
F12	Absolute Quantification	AH1021-Day0	KSHV-ORF26	0	935	0	0	0	0
G12	Absolute Quantification	AH1021-Day3	KSHV-ORF26	0	212	0	0	0	0
H12	Absolute Quantification	AH1022-Day0	KSHV-ORF26	0	275	0	0	0	0
F07	Absolute Quantification	AH1024-Day0	KSHV-ORF26	0	241	0	0	0	0
G07	Absolute Quantification	AH1024-Day3	KSHV-ORF26	0	332	0	0	0	0
H07	Absolute Quantification	AH1025-Day0	KSHV-ORF26	0	75	0	0	0	0
A08	Absolute Quantification	AH1025-Day3	KSHV-ORF26	0	139	0	0	0	0
B08	Absolute Quantification	AH1026-Day0	KSHV-ORF26	0	861	0	0	0	0
C08	Absolute Quantification	AH1026-Day3	KSHV-ORF26	0	841	0	0	0	0
D08	Absolute Quantification	AH1027-Day0	KSHV-ORF26	0	874	0	0	0	0
E08	Absolute Quantification	AH1027-Day3	KSHV-ORF26	0	689	0	0	0	0
F08	Absolute Quantification	AH1028-Day0	KSHV-ORF26	0	2060	0	0	0	0
G08	Absolute Quantification	AH1028-Day3	KSHV-ORF26	0	473	0	0	0	0
H08	Absolute Quantification	AH1029-Day0	KSHV-ORF26	0	555	0	0	0	0
A09	Absolute Quantification	AH1029-Day3	KSHV-ORF26	0	0.66	0	0	0	0
B09	Absolute Quantification	AH1030-Day0	KSHV-ORF26	0	0	0	0	0	0
C09	Absolute Quantification	AH1030-Day3	KSHV-ORF26	0	454	0	0	0	0
D09	Absolute Quantification	AH1031-Day0	KSHV-ORF26	0	469	0	0	0	0
E09	Absolute Quantification	AH1031-Day3	KSHV-ORF26	0	605	0	0	0	0
F09	Absolute Quantification	AH1032-Day0	KSHV-ORF26	0	567	0	0	0	0
G09	Absolute Quantification	AH1032-Day3	KSHV-ORF26	0	239	0	0	0	0
H09	Absolute Quantification	AH1033-Day0	KSHV-ORF26	0	609	0	0	0	0
A10	Absolute Quantification	AH1033-Day3	KSHV-ORF26	0	599	0	0	0	0
B10	Absolute Quantification	AH1034-Day0	KSHV-ORF26	0	877	0	0	0	0
C10	Absolute Quantification	AH1034-Day3	KSHV-ORF26	0	425	0	0	0	0
D10	Absolute Quantification	AH1035-Day0	KSHV-ORF26	0	255	0	0	0	0
E10	Absolute Quantification	AH1035-Day3	KSHV-ORF26	0	323	0	0	0	0
F10	Absolute Quantification	AH1036-Day0	KSHV-ORF26	0	541	0	0	0	0
G10	Absolute Quantification	AH1036-Day3	KSHV-ORF26	0	482	0	0	0	0
H10	Absolute Quantification	AH1037-Day0	KSHV-ORF26	0	199	0	0	0	0
A11	Absolute Quantification	AH1037-Day3	KSHV-ORF26	0	653	0	0	0	0
B11	Absolute Quantification	AH1038-Day0	KSHV-ORF26	0	746	0	0	0	0
C11	Absolute Quantification	AH1038-Day3	KSHV-ORF26	0	625	0	0	0	0
D11	Absolute Quantification	AH1039-Day0	KSHV-ORF26	0	1015	0	0	0	0
E11	Absolute Quantification	AH1039-Day3	KSHV-ORF26	0	935	0	0	0	0
F11	Absolute Quantification	AH1040-Day0	KSHV-ORF26	0	1626	0	0	0	0
G11	Absolute Quantification	AH1040-Day3	KSHV-ORF26	0	494	0	0	0	0
H11	Absolute Quantification	AH1041-Day0	KSHV-ORF26	0	1085	0	0	0	0
A12	Absolute Quantification	AH1041-Day3	KSHV-ORF26	0	440	0	0	0	0
B12	Absolute Quantification	AH1042-Day0	KSHV-ORF26	0	307	0	0	0	0
C12	Absolute Quantification	AH1042-Day3	KSHV-ORF26	0	160	0	0	0	0
D12	Absolute Quantification	AH1043-Day0	KSHV-ORF26	0	476	0	0	0	0
E12	Absolute Quantification	AH1043-Day3	KSHV-ORF26	0	198	0	0	0	0
F12	Absolute Quantification	AH1044-Day0	KSHV-ORF26	0	1074	0	0	0	0
G12	Absolute Quantification	AH1044-Day3	KSHV-ORF26	0	658	0	0	0	0
H12	Absolute Quantification	AH1045-Day0	KSHV-ORF26	0	70	0	0	0	0
B07	Absolute Quantification	BL41	KSHV-ORF26	0	1132	0	0	0	0
B07	Absolute Quantification	BL41	KSHV-ORF26	0	1665	0	0	0	0
D07	Absolute Quantification	KSHV + control	KSHV-ORF26	525	0	0	0	0	0
D07	Absolute Quantification	KSHV + control	KSHV-ORF26	585	0	0	0	0	0
C07	Absolute Quantification	Namalwa	KSHV-ORF26	0	2204	0	0	0	0
C07	Absolute Quantification	Namalwa	KSHV-ORF26	0	2700	0	0	0	0
A07	Absolute Quantification	NTC	KSHV-ORF26	0	0	0	0	0	0
E07	Absolute Quantification	NTC	KSHV-ORF26	0	0	0	0	0	0
A07	Absolute Quantification	NTC	KSHV-ORF26	0	0	0	0	0	0
E07	Absolute Quantification	NTC	KSHV-ORF26	0	0	0	0	0	0

## Sheet: Table S2 EBV ddPCR
Well	ExptType	Sample	Target	EBV/KSHV Conc. (copies/ul)	Human- B-actin Conc. (copies/ul)	EBV copies/cell	EBV copies/ng DNA	EBV copies/ug DNA	log EBV copies
F01	Absolute Quantification	AH1001-Day0	EBV-Balf5	1.1	1462	0.00150479	0.227998	227.998	2.35793
G01	Absolute Quantification	AH1001-Day3	EBV-Balf5	0	1005	0	0	0	0
H01	Absolute Quantification	AH1002-Day0	EBV-Balf5	0	847	0	0	0	0
A02	Absolute Quantification	AH1002-Day3	EBV-Balf5	0	542	0	0	0	0
B02	Absolute Quantification	AH1003-Day0	EBV-Balf5	0	0	0	0	0	0
C02	Absolute Quantification	AH1003-Day3	EBV-Balf5	0	915	0	0	0	0
D02	Absolute Quantification	AH1004-Day0	EBV-Balf5	0	149	0	0	0	0
E02	Absolute Quantification	AH1004-Day3	EBV-Balf5	0	801	0	0	0	0
F02	Absolute Quantification	AH1005-Day0	EBV-Balf5	0	940	0	0	0	0
G02	Absolute Quantification	AH1005-Day3	EBV-Balf5	0	391	0	0	0	0
H02	Absolute Quantification	AH1006-Day0	EBV-Balf5	0	477	0	0	0	0
A03	Absolute Quantification	AH1006-Day3	EBV-Balf5	3.3	817	0.00807834	1.22399	1223.99	3.08778
B03	Absolute Quantification	AH1007-Day0	EBV-Balf5	0	394	0	0	0	0
C03	Absolute Quantification	AH1007-Day3	EBV-Balf5	0	783	0	0	0	0
D03	Absolute Quantification	AH1008-Day0	EBV-Balf5	0	424	0	0	0	0
E03	Absolute Quantification	AH1008-Day3	EBV-Balf5	0	1179	0	0	0	0
F03	Absolute Quantification	AH1009-Day0	EBV-Balf5	0	614	0	0	0	0
G03	Absolute Quantification	AH1009-Day3	EBV-Balf5	2.9	1114	0.00520646	0.788858	788.858	2.897
H03	Absolute Quantification	AH1010-Day0	EBV-Balf5	0	0	0	0	0	0
A04	Absolute Quantification	AH1010-Day3	EBV-Balf5	0	633	0	0	0	0
B04	Absolute Quantification	AH1011-Day0	EBV-Balf5	0	903	0	0	0	0
C04	Absolute Quantification	AH1011-Day3	EBV-Balf5	3	166	0.0361446	5.47645	5476.45	3.7385
D04	Absolute Quantification	AH1012-Day0	EBV-Balf5	4.8	440	0.0218182	3.30579	3305.79	3.51927
E04	Absolute Quantification	AH1012-Day3	EBV-Balf5	0	94	0	0	0	0
F04	Absolute Quantification	AH1013-Day0	EBV-Balf5	1.4	337	0.00830861	1.25888	1258.88	3.09998
G04	Absolute Quantification	AH1013-Day3	EBV-Balf5	0	448	0	0	0	0
H04	Absolute Quantification	AH1014-Day0	EBV-Balf5	0	369	0	0	0	0
A05	Absolute Quantification	AH1014-Day3	EBV-Balf5	0	236	0	0	0	0
B05	Absolute Quantification	AH1015-Day0	EBV-Balf5	0.81	968	0.00167355	0.253569	253.569	2.4041
C05	Absolute Quantification	AH1015-Day3	EBV-Balf5	0	470	0	0	0	0
D05	Absolute Quantification	AH1016-Day0	EBV-Balf5	0	979	0	0	0	0
E05	Absolute Quantification	AH1016-Day3	EBV-Balf5	5.3	324	0.032716	4.95698	4956.98	3.69522
F05	Absolute Quantification	AH1017-Day0	EBV-Balf5	41.1	1004	0.0818725	12.4049	12404.9	4.09359
G05	Absolute Quantification	AH1017-Day3	EBV-Balf5	2.2	1585	0.00277603	0.42061	420.61	2.62388
H05	Absolute Quantification	AH1018-Day0	EBV-Balf5	0	61.1	0	0	0	0
A06	Absolute Quantification	AH1018-Day3	EBV-Balf5	0	1220	0	0	0	0
B06	Absolute Quantification	AH1019-Day0	EBV-Balf5	0	841	0	0	0	0
C06	Absolute Quantification	AH1019-Day3	EBV-Balf5	2.8	1587	0.00352867	0.534647	534.647	2.72807
D06	Absolute Quantification	AH1020-Day0	EBV-Balf5	0	0	0	0	0	0
E06	Absolute Quantification	AH1020-Day3	EBV-Balf5	0	426	0	0	0	0
F06	Absolute Quantification	AH1021-Day0	EBV-Balf5	0	974	0	0	0	0
G06	Absolute Quantification	AH1021-Day3	EBV-Balf5	0	219	0	0	0	0
H06	Absolute Quantification	AH1022-Day0	EBV-Balf5	0	279	0	0	0	0
F01	Absolute Quantification	AH1024_Day0	EBV-Balf5	2.7	268	0.0201493	3.05292	3052.92	3.48472
G01	Absolute Quantification	AH1024-Day3	EBV-Balf5	0	351	0	0	0	0
H01	Absolute Quantification	AH1025-Day0	EBV-Balf5	0	71.5	0	0	0	0
A02	Absolute Quantification	AH1025-Day3	EBV-Balf5	0	134	0	0	0	0
B02	Absolute Quantification	AH1026-Day0	EBV-Balf5	0	884	0	0	0	0
C02	Absolute Quantification	AH1026-Day3	EBV-Balf5	0.91	862	0.00211137	0.319904	319.904	2.50502
D02	Absolute Quantification	AH1027-Day0	EBV-Balf5	0	848	0	0	0	0
E02	Absolute Quantification	AH1027-Day3	EBV-Balf5	0	682	0	0	0	0
F02	Absolute Quantification	AH1028-Day0	EBV-Balf5	0	2124	0	0	0	0
G02	Absolute Quantification	AH1028-Day3	EBV-Balf5	0	472	0	0	0	0
H02	Absolute Quantification	AH1029-Day0	EBV-Balf5	0	569	0	0	0	0
A03	Absolute Quantification	AH1029-Day3	EBV-Balf5	0	0	0	0	0	0
B03	Absolute Quantification	AH1030-Day0	EBV-Balf5	0	0	0	0	0	0
C03	Absolute Quantification	AH1030-Day3	EBV-Balf5	2.6	443	0.0117381	1.77851	1778.51	3.25006
D03	Absolute Quantification	AH1031-Day0	EBV-Balf5	0	490	0	0	0	0
E03	Absolute Quantification	AH1031-Day3	EBV-Balf5	0	598	0	0	0	0
F03	Absolute Quantification	AH1032-Day0	EBV-Balf5	0	567	0	0	0	0
G03	Absolute Quantification	AH1032-Day3	EBV-Balf5	5.2	227	0.045815	6.94166	6941.66	3.84146
H03	Absolute Quantification	AH1033-Day0	EBV-Balf5	1.5	616	0.00487013	0.737898	737.898	2.868
A04	Absolute Quantification	AH1033-Day3	EBV-Balf5	14.8	587	0.0504259	7.64029	7640.29	3.88311
B04	Absolute Quantification	AH1034-Day0	EBV-Balf5	0	834	0	0	0	0
C04	Absolute Quantification	AH1034-Day3	EBV-Balf5	0	429	0	0	0	0
D04	Absolute Quantification	AH1035-Day0	EBV-Balf5	0	249	0	0	0	0
E04	Absolute Quantification	AH1035-Day3	EBV-Balf5	2.4	361	0.0132964	2.01461	2014.61	3.30419
F04	Absolute Quantification	AH1036-Day0	EBV-Balf5	0	542	0	0	0	0
G04	Absolute Quantification	AH1036-Day3	EBV-Balf5	0	479	0	0	0	0
H04	Absolute Quantification	AH1037-Day0	EBV-Balf5	0	194	0	0	0	0
A05	Absolute Quantification	AH1037-Day3	EBV-Balf5	4.8	655	0.0146565	2.22068	2220.68	3.34649
B05	Absolute Quantification	AH1038-Day0	EBV-Balf5	0	736	0	0	0	0
C05	Absolute Quantification	AH1038-Day3	EBV-Balf5	0	606	0	0	0	0
D05	Absolute Quantification	AH1039-Day0	EBV-Balf5	0	1022	0	0	0	0
E05	Absolute Quantification	AH1039-Day3	EBV-Balf5	0	891	0	0	0	0
F05	Absolute Quantification	AH1040-Day0	EBV-Balf5	0	1578	0	0	0	0
G05	Absolute Quantification	AH1040-Day3	EBV-Balf5	0	460	0	0	0	0
H05	Absolute Quantification	AH1041-Day0	EBV-Balf5	3.6	1058	0.00680529	1.03111	1031.11	3.0133
A06	Absolute Quantification	AH1041-Day3	EBV-Balf5	0	429	0	0	0	0
B06	Absolute Quantification	AH1042-Day0	EBV-Balf5	0	303	0	0	0	0
C06	Absolute Quantification	AH1042-Day3	EBV-Balf5	0	158	0	0	0	0
D06	Absolute Quantification	AH1043-Day0	EBV-Balf5	0	467	0	0	0	0
E06	Absolute Quantification	AH1043-Day3	EBV-Balf5	0	199	0	0	0	0
F06	Absolute Quantification	AH1044-Day0	EBV-Balf5	0	1000	0	0	0	0
G06	Absolute Quantification	AH1044-Day3	EBV-Balf5	0	710	0	0	0	0
H06	Absolute Quantification	AH1045-Day0	EBV-Balf5	0	74.4	0	0	0	0
B01	Absolute Quantification	BL41	EBV-Balf5	0	2066	0	0	0	0
B01	Absolute Quantification	BL41	EBV-Balf5	0	1475	0	0	0	0
D01	Absolute Quantification	Jijoye	EBV-Balf5	219	19.7	22.2335	3368.71	3.36871e+06	6.52746
D01	Absolute Quantification	Jijoye	EBV-Balf5	251	20.1	24.9751	3784.11	3.78411e+06	6.57796
C01	Absolute Quantification	Namalwa	EBV-Balf5	1874	2950	1.27051	192.501	192501	5.28443
C01	Absolute Quantification	Namalwa	EBV-Balf5	1684	2563	1.31409	199.104	199104	5.29908
A01	Absolute Quantification	NTC	EBV-Balf5	0	0	0	0	0	0
E01	Absolute Quantification	NTC	EBV-Balf5	0	0	0	0	0	0
A01	Absolute Quantification	NTC	EBV-Balf5	0	0	0	0	0	0
E01	Absolute Quantification	NTC	EBV-Balf5	0	0	0	0	0	0
